CORRECTION

# Correction: Diabetes risks and outcomes in chronic obstructive pulmonary disease patients: Two nationwide population-based retrospective cohort studies

The *PLOS ONE* Staff

There is an error in affiliation 1 for authors Chao-Shun Lin, Chih-Chung Liu, Ta-Liang Chen, and Chien-Chang Liao. Affiliation 1 should be: Department of Anesthesiology, School of Medicine, College of Medicine, Taipei Medical University, Taipei, Taiwan.

There is an error in affiliation 3 for authors Chao-Shun Lin, Chih-Chung Liu, Ta-Liang Chen, and Chien-Chang Liao. Affiliation 3 should be: Department of Anesthesiology, Taipei Medical University Hospital, Taipei, Taiwan. The publisher apologizes for the errors.

## Reference

1. Lin C-S, Liu C-C, Yeh C-C, Chang Y-C, Chung C-L, Lane H-L, et al. (2017) Diabetes risks and outcomes in chronic obstructive pulmonary disease patients: Two nationwide population-based retrospective cohort studies. *PLoS ONE* 12(8): e0181815. <https://doi.org/10.1371/journal.pone.0181815> PMID: 28813433

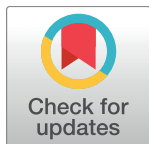

## OPEN ACCESS

**Citation:** The *PLOS ONE* Staff (2017) Correction: Diabetes risks and outcomes in chronic obstructive pulmonary disease patients: Two nationwide population-based retrospective cohort studies. *PLoS ONE* 12(12): e0190289. <https://doi.org/10.1371/journal.pone.0190289>

**Published:** December 20, 2017

**Copyright:** © 2017 The PLOS ONE Staff. This is an open access article distributed under the terms of the [Creative Commons Attribution License](https://creativecommons.org/licenses/by/4.0/), which permits unrestricted use, distribution, and reproduction in any medium, provided the original author and source are credited.
